# Supplementary material
Source: publisher figshare collection journal article supplement (https://aacr.figshare.com/articles/dataset/_/22820335)
Supplement: Supplementary file 1 [file 40570606]

**Supplementary Information Inventory:**

**Figure S1**, related to Figure 1.

**Figure S2**, related to Figure 2.

**Figure S3**, related to Figure 4.

**Figure S4**, related to Figure 5.

**Figure S5**, related to Figure 6.

**Supplementary Methods**

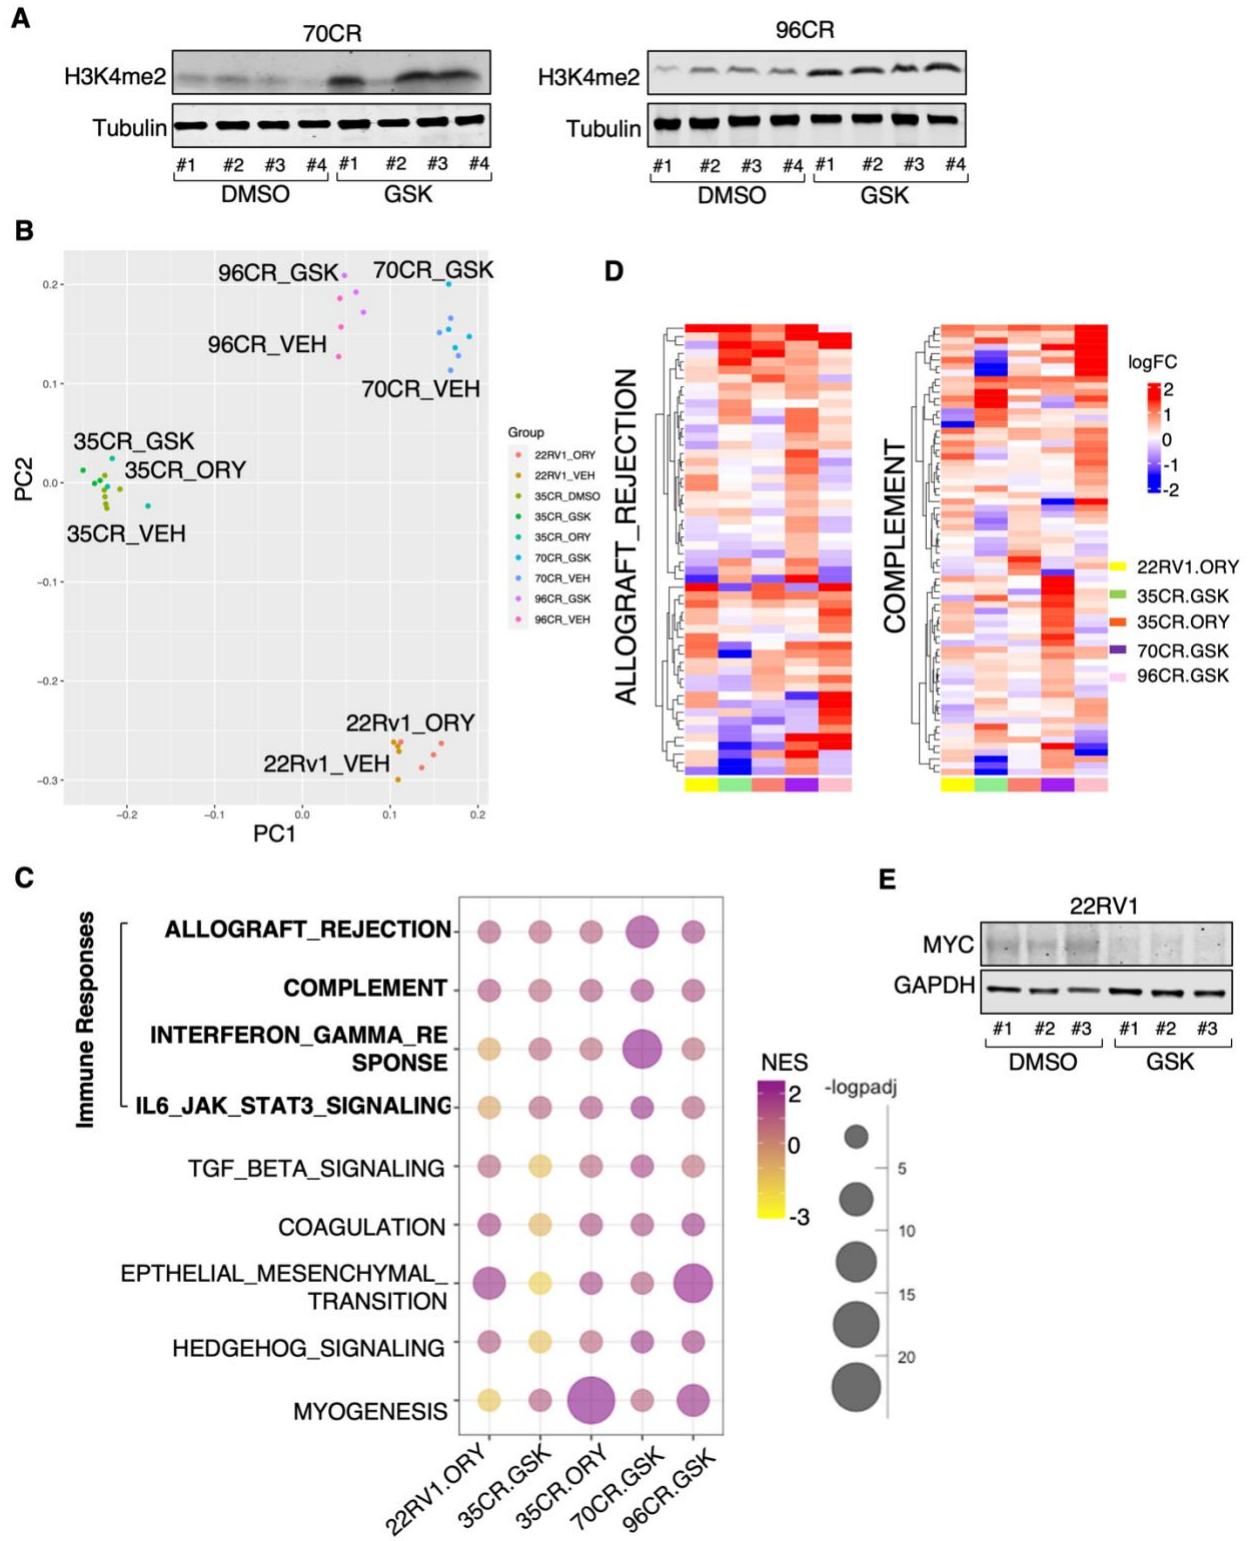

**Supplementary Figure S1. LSD1-i activates immune response pathways**

(A) Immunoblotting for H3K4me2 in LuCaP70CR and 96CR xenograft tumor samples. (B) The PCA plot of the RNA-seq data from all xenograft studies. (C) GSEA for the top-ranked LSD1-i-upregulated pathways that are common among models. (D) The heatmap view of the genes in Allograft Rejection and Complement pathways (immune-related). (E) Immunoblotting for MYC in 22RV1 xenograft tissues treated with LSD1 inhibitor.

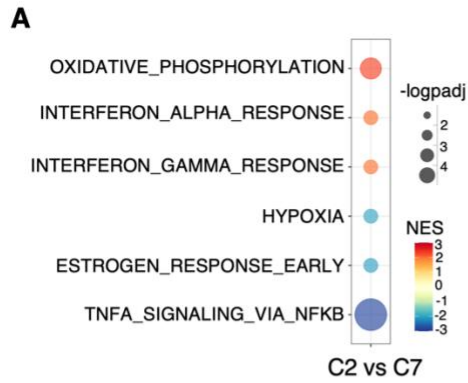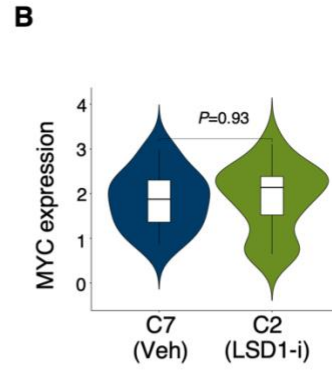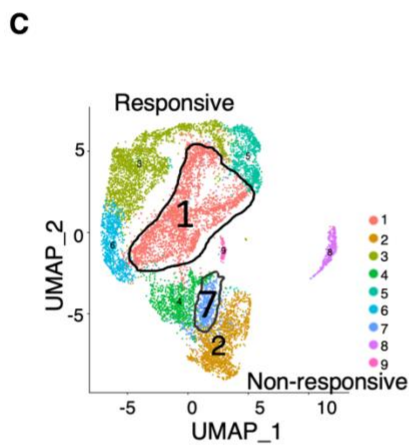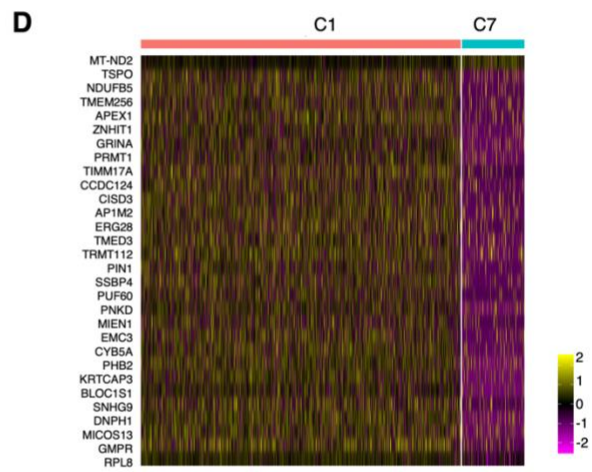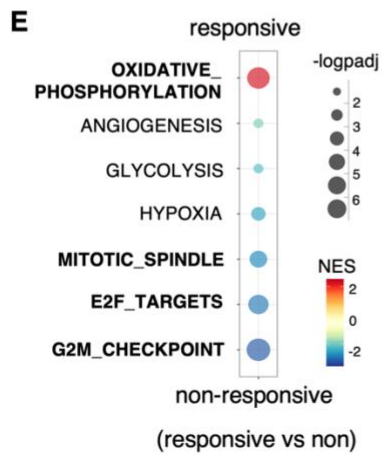

**Supplementary Figure S2. Comparing gene expressions in responsive versus non-responsive populations in LuCaP 96CR model**

(A) The GSEA showing the hallmark pathways that were significantly changed by GSK2879552 treatment in cluster 7 versus cluster 2 (cutoff:  $P\text{-adj}<0.05$ ). (B) The violin plot of *MYC* gene expression in Vehicle (cluster 7) vs. GSK2879552 (cluster 2). (C) Cluster 1 (Responsive, vehicle-treated) and cluster 7 (Non-responsive, vehicle-treated) are highlighted. (D) Top-ranked genes that are differentially expressed between C1 and C7. (E) The GSEA showing the hallmark pathways that were enriched and de-enriched in the non-responsive populations (cutoff:  $P\text{-adj}<0.05$ ).

**A**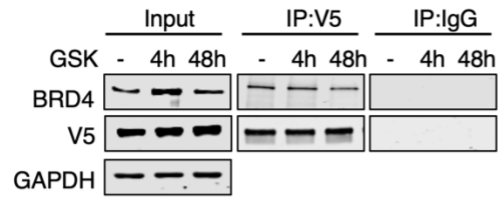**B**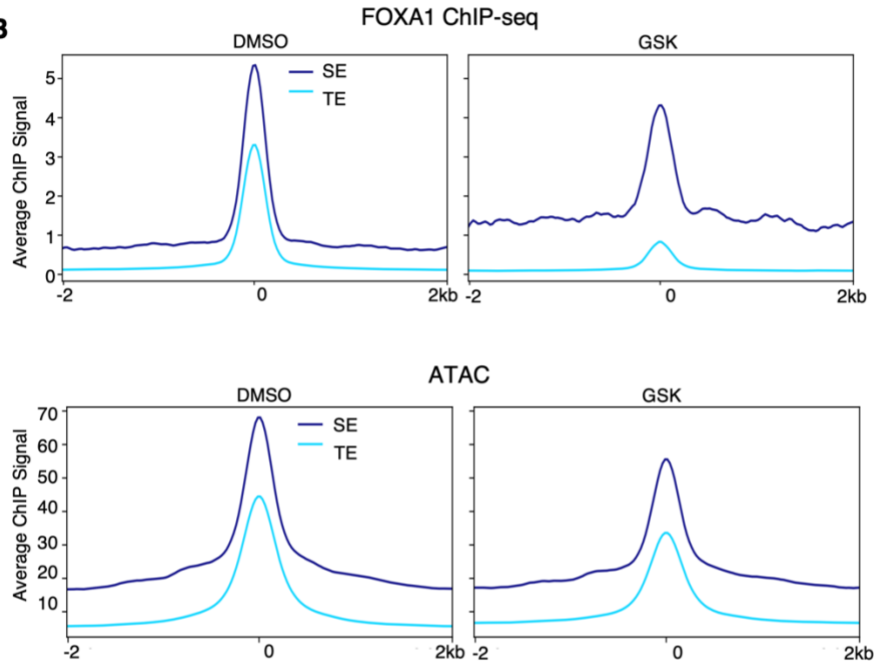**C**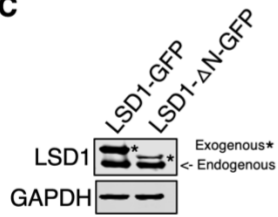**D**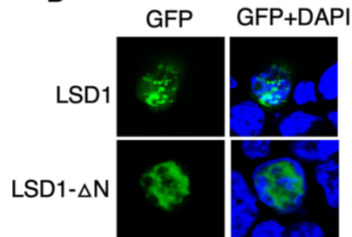

**Supplementary Figure S3. LSD1 enriches at SEs and forms phase separation**

(A) LNCaP cells stably expressing V5-FOXA1 were treated with LSD1 inhibitor GSK2879552 (50  $\mu$ M) for 4 hours and 48 hours, and subjected to V5 pull down. Immunoblotting for BRD4 and V5 were shown. (B) FOXA1 binding (ChIP-seq of FOXA1) and ATAC signals on both SEs and TEs in LNCaP cells (grown in CSS) treated with GSK2879552 (50  $\mu$ M, 4 hours). (C, D) 293T cells transfected with LSD1-GFP and LSD1- $\Delta$ N-GFP (1-100 amino acids deletion) were subjected to immunoblotting for LSD1 (C) and confocal microscopy of GFP (D).

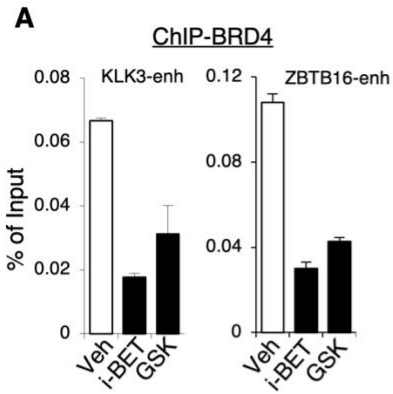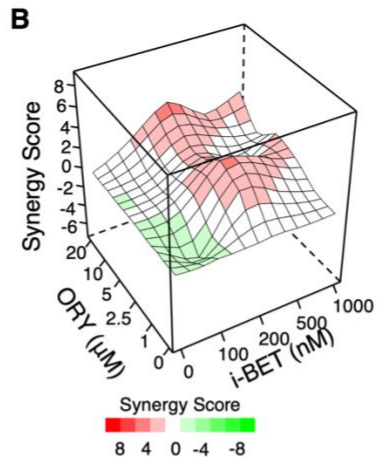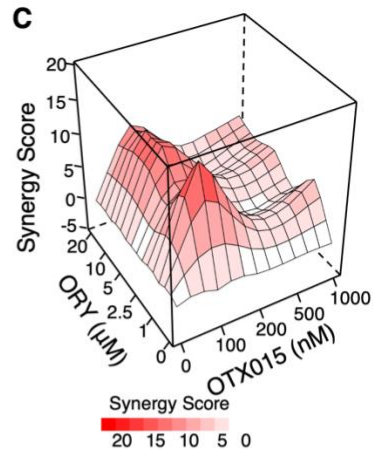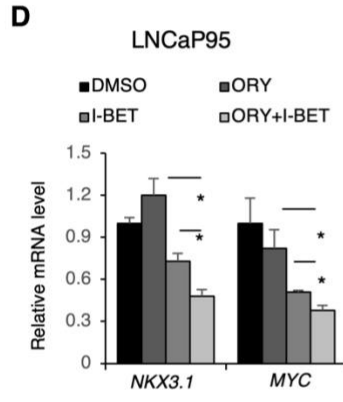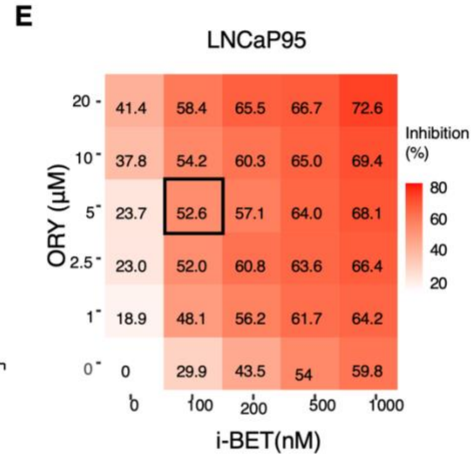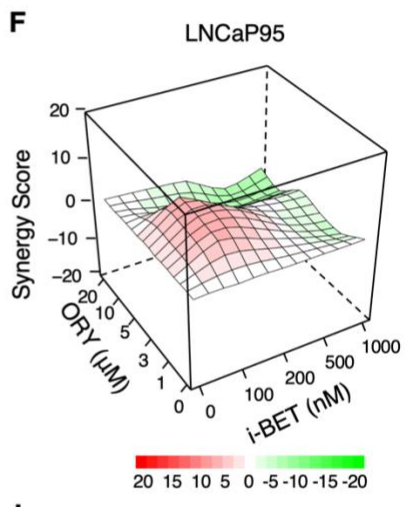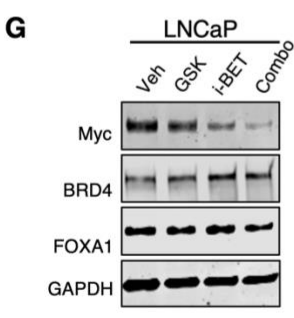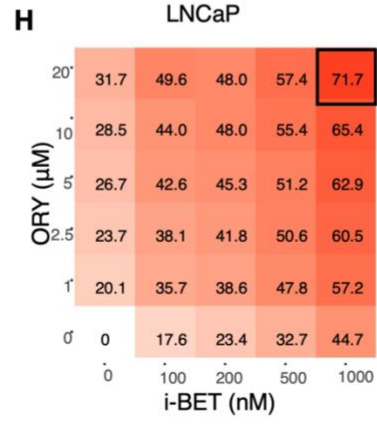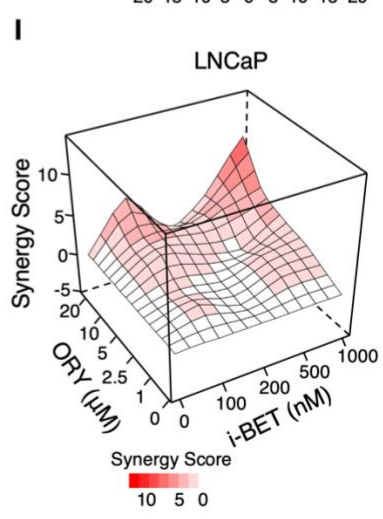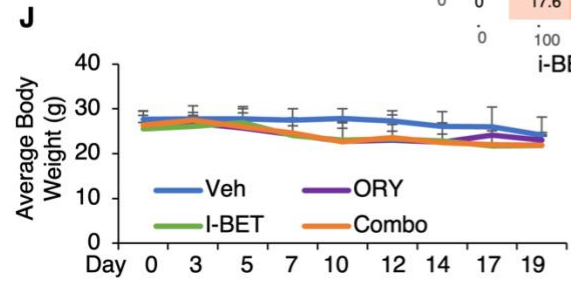



#### **Supplementary Figure S4. LSD1-i synergizes with BET-i to suppress CRPC growth**

(A) 22RV1 cells grown in hormone-depleted medium were treated with i-BET762 (1  $\mu$ M) or GSK2879552 (1  $\mu$ M) for 4 hours. BRD4 binding on two AR-activated enhancers was measured by ChIP-qPCR. (B, C) 3-D plot of synergy scores of the combination treatments – ORY-1001+i-BET762 (B) and ORY-1001+OTX015 (C). (D) LNCaP95 cells grown in hormone-depleted medium were treated with 5 $\mu$ M ORY-1001, 100 nM i-BET 762, or the combination for 1 day, and *NKX3.1* and *MYC* expression was examined by RT-qPCR. (E) The heatmap view of the percentage of inhibition of LNCaP95 cells treated with the combination of indicated doses of ORY-1001 and i-BET762 for 4 days. (F) 3-D plot of synergy scores of the combination treatments – ORY-1001+i-BET762 in LNCaP95 cells. (G) LNCaP cells grown in full serum were treated with 1 $\mu$ M ORY-1001, 1 $\mu$ M i-BET 762, or the combination for 1 day, and MYC protein was examined by immunoblotting. (H) The heatmap view of the percentage of inhibition of LNCaP cells treated with the combination of indicated doses of ORY-1001 and i-BET762 for 4 days. (I) 3-D plot of synergy scores of the combination treatments – ORY-1001+i-BET762 in LNCaP cells. (J) Body weight of castrated SCID mice receiving the indicated treatment.

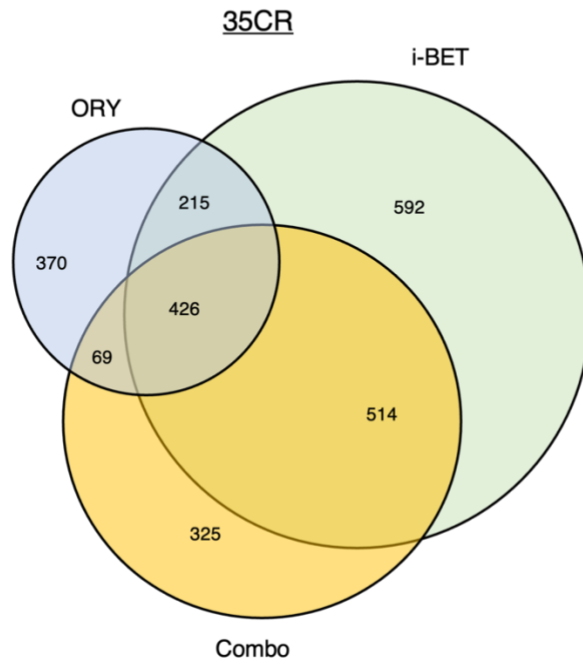

**Supplementary Figure S5. Co-targeting LSD1 and BRD4 in 35CR model**

RNA-seq analyses were performed using the tissue samples at the end of the treatment in 35CR model. The Venn diagram for ORY-1001-repressed genes, i-BET762-repressed genes, and the combination treatment-repressed genes is shown.

## **SUPPLEMENTRAY METHODS**

### **Plasmids construction:**

The mutant LSD1-del(1-100) was generated using QuickChange Lightning Site-Directed Mutagenesis Kit (Agilent Technologies, cat# 210518) from wild-type LSD1. The mutagenesis PCR primers are: 5'-ATGTTATCTGGGAAGAAGGGAATAGCAGAGACTCCG-3'; 5'-CGGAGTCTCTGCTATTCCCTTCTTCCCAGATAACAT-3'. Then wildtype (WT) and the mutant LSD1-del100 was cloned into the pDEST-CMV-N-EGFP vector (Addgene 122842) using the Gateway Technology with Clonase II (Invitrogen, Cat# 12535-029) to generate EGFP-tagged LSD1 at its N terminus.
